# Supplementary material
Source: publisher site journal article supplement (https://www.spandidos-publications.com/4908/downloadSupplementary)

Figure S1. Flow cytometric analysis of cell cycle and cell apoptosis.

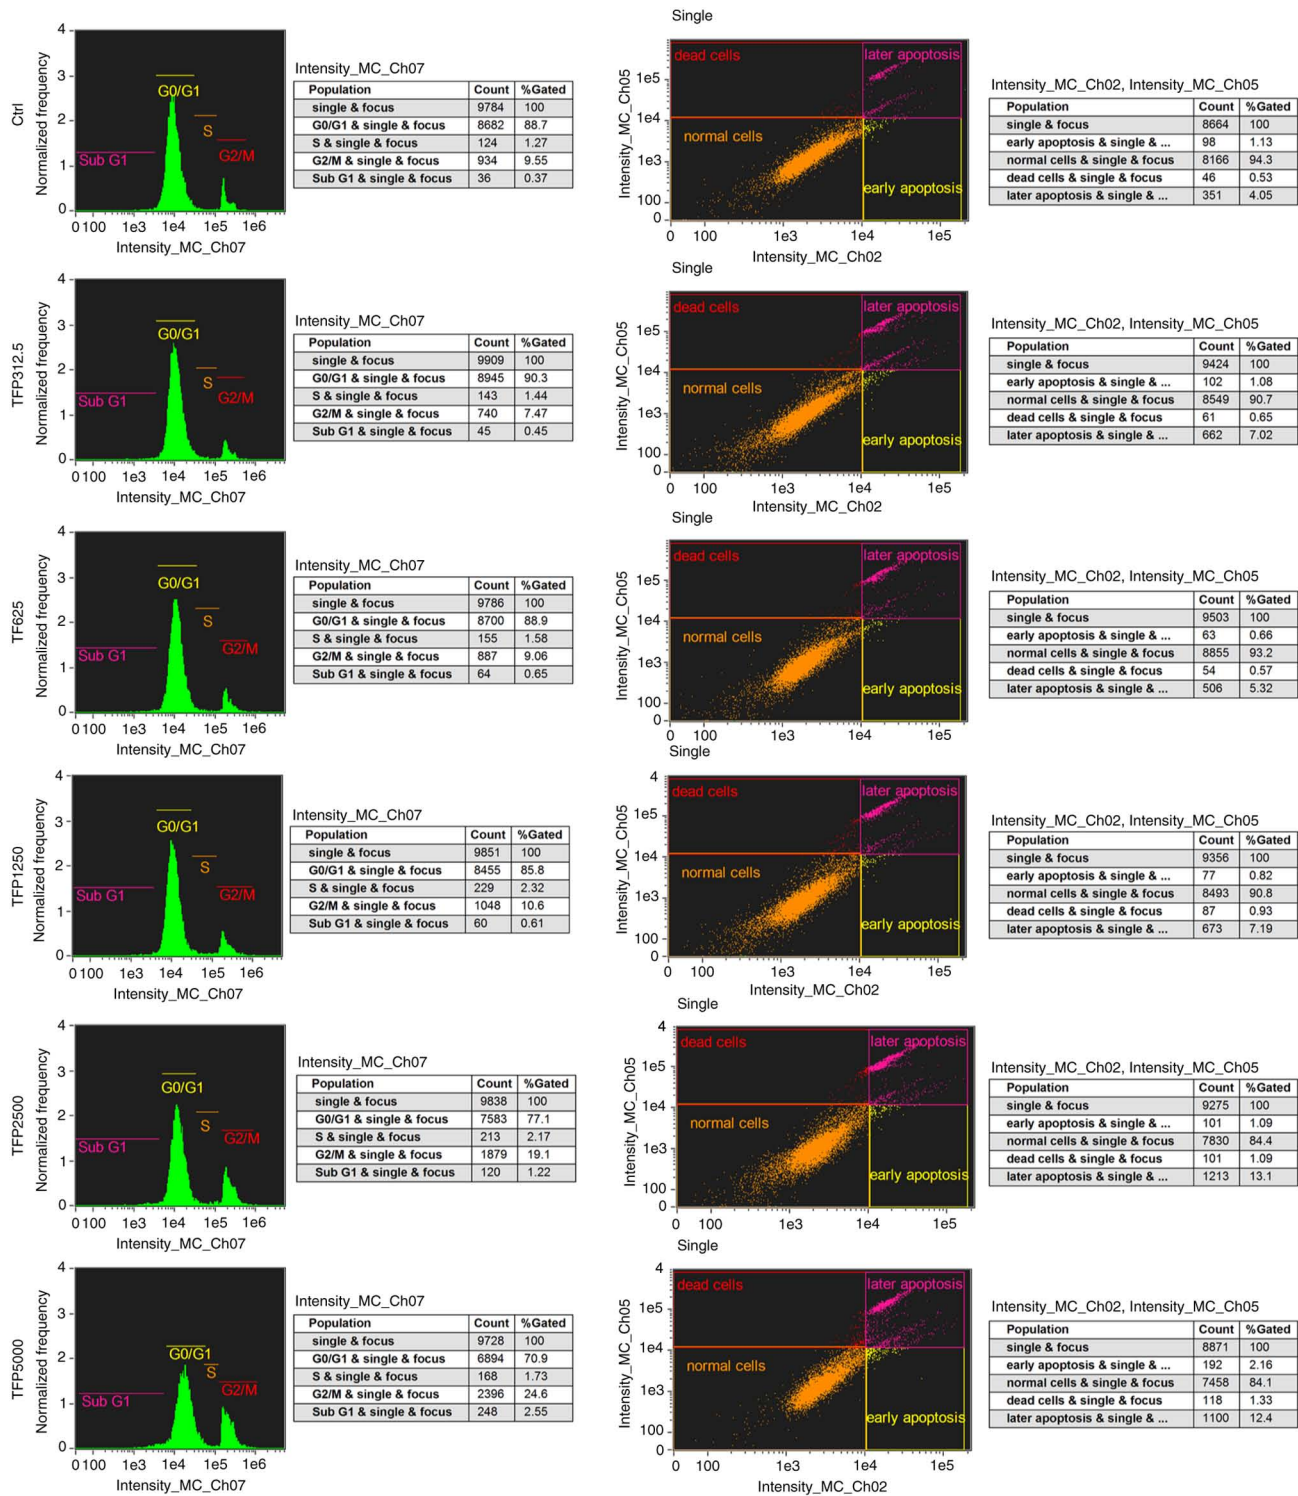

Figure S2. The separate images for colocalization of the immunohistochemistry in Fig. 6A.

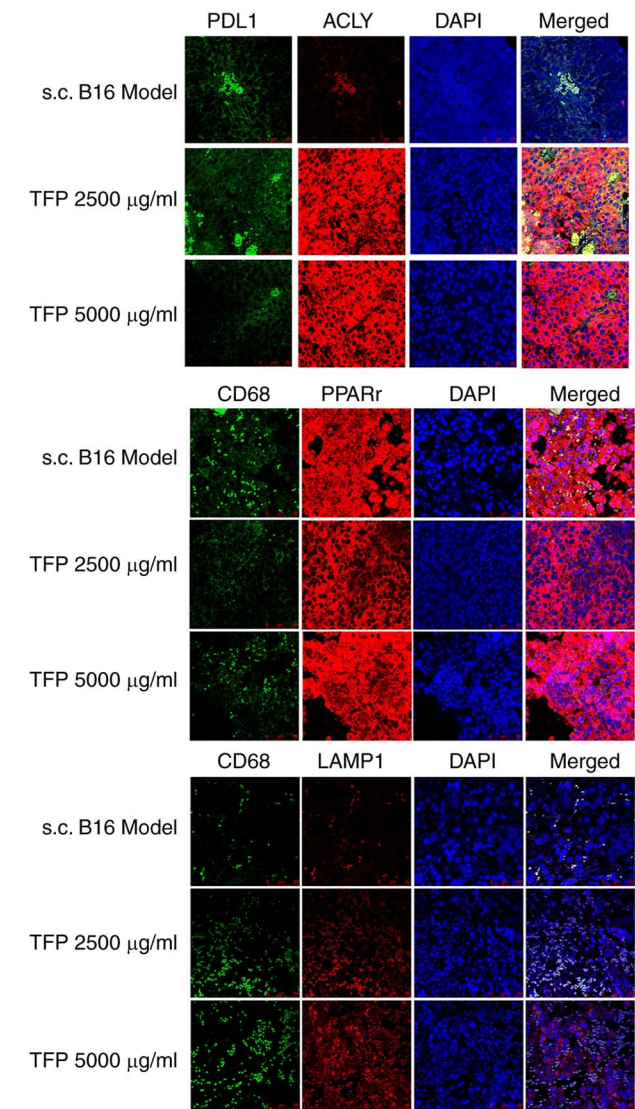

Supplement: Supplementary file 1 [file downloadSupplementary]
